# Supplementary material for: Excellent Thermoelectric Performance of 2D CuMN2 (M = Sb, Bi; N = S, Se) at Room Temperature
Source: MDPI journal article supplement (doi:10.3390/ma15196700), 2022-09-27
Supplement: s1 [file s1]

Supplementary Materials for

**Excellent thermoelectric performance of 2D CuMN<sub>2</sub> (M = Sb, Bi; N = S, Se) at room temperature**

Wenyu Fang<sup>1, 2†</sup>, Yue Chen<sup>1†</sup>, Kuan Kuang<sup>1</sup>, Mingkai Li<sup>1\*</sup>

<sup>1</sup> Ministry-of-Education Key Laboratory of Green Preparation and Application for Functional Materials, Hubei Key Lab of Ferro & Piezoelectric Materials and Devices, Hubei Key Laboratory of Polymer Materials, and School of Materials Science & Engineering, Hubei University, Wuhan 430062, China

<sup>2</sup> Public Health and Management School, Hubei University of Medicine, Shiyan 442000, China

<sup>†</sup>These authors contributed equally to this work.

\*Corresponding authors.

E-mail addresses: mkli@hubu.edu.cn (M. K. Li).

**Calculation details**

We carried out our calculations in Vienna Ab initio Simulation Package (VASP), in which the Generalized Gradient Approximation (GGA) and Perdew - Burke - Ernzerhof (PBE) functional was adopted to exchange-correlation approximation. The kinetic energy cut-off for plane-

wave basis was set as 500 eV, the convergence criteria for total energy and ion were set as  $1.0 \times 10^{-7}$  eV and -0.005 eV, respectively. The k-mesh of  $20 \times 20 \times 1$  was adopted in self-consistent calculation, and the k-points path in first Brillouin region for band structure and phonon dispersion was set as  $\Gamma - X - S - Y - \Gamma$ , as shown in Figure 1(e). Also, we selected  $4 \times 5 \times 1$  supercell (160 atoms) to calculate the phonon dispersion and lattice thermal conductivity with  $4 \times 4 \times 1$   $q$ - points mesh.

### Carrier mobility

The carrier mobility was first calculated by the method of deformation potential theory (DPT) proposed by Bardeen and Shockley, which can be expressed as:

$$\mu_{2D} = \frac{e\hbar^3 C^{2D}}{k_B T m^* m_l^* (E_l^i)^2} \quad (S1)$$

Where  $\mu_{2D}$ ,  $\hbar$ ,  $k_B$ , and  $T$  are in-plane mobility, the reduced Planck constant, Boltzmann constant, and temperature.  $m^*$  can be obtained by using the second derivative of the energy near the VBM and CBM with respect to the wave vector, i.e,  $m^* = \hbar^2 / (\frac{\partial^2 E}{\partial k^2})$ , here  $E$  and  $k$  are the energy and wave vector, respectively, and  $m_l^*$  is the geometric average of the effective mass along the  $a$  and  $b$  directions, i.e,  $m_l^* = \sqrt{m_a^* m_b^*}$ .

And then, we adopted the acoustic phonon-limited method (APM) proposed by Lang *et al.* in 2016, which can be applied to anisotropic 2D materials, and its calculation methods are as follows:

$$\mu_x = \frac{e\hbar^3}{k_B T (m_x)^{\frac{3}{2}} (m_y)^{\frac{1}{2}}} \left( \frac{A+B-\sqrt{A^2-B^2}}{B\sqrt{A^2-B^2}} \right) \times \left( \frac{I+J-\sqrt{I^2-J^2}}{J\sqrt{I^2-J^2}} \right) \quad (\text{S2})$$

$$A = \bar{E}_l^2 + \frac{(\Delta E_l)^2}{2}, \quad B = \bar{E}_l \Delta E_l \quad (\text{S3})$$

$$\bar{E}_l = \frac{E_{lx}+E_{ly}}{2}, \quad \Delta E_l = \frac{E_{ly}-E_{lx}}{2} \quad (\text{S4})$$

$$\bar{C} = \frac{C_{11}+C_{22}}{2}, \quad \Delta C = \frac{C_{22}-C_{11}}{2} \quad (\text{S5})$$

$$I = \frac{1}{\sqrt{\bar{C}^2-(\Delta C)^2}}, \quad J = \frac{\bar{C}}{\Delta C} \left( \frac{1}{\bar{C}} - \frac{1}{\sqrt{\bar{C}^2-(\Delta C)^2}} \right) \quad (\text{S6})$$

**Table S1** The total energies, and cleavage energies ( $E_f$ ) for the monolayers.

| Monolayers          | Bulk (eV) | Mono (eV) | $S$ ( $\text{\AA}^2$ ) | $a$ ( $\text{\AA}^2$ ) | $b$ ( $\text{\AA}^2$ ) | $E_f$ (J/m <sup>2</sup> ) |
|---------------------|-----------|-----------|------------------------|------------------------|------------------------|---------------------------|
| CuSbS <sub>2</sub>  | -289.32   | -143.64   | 22.74                  | 6.04                   | 3.77                   | 0.72                      |
| CuSbSe <sub>2</sub> | -371.53   | -184.69   | 25.20                  | 6.34                   | 3.97                   | 0.68                      |
| CuBiS <sub>2</sub>  | -453.71   | -225.46   | 23.98                  | 6.18                   | 3.88                   | 0.93                      |
| CuBiSe <sub>2</sub> | -536.26   | -266.74   | 26.31                  | 6.47                   | 4.07                   | 0.85                      |

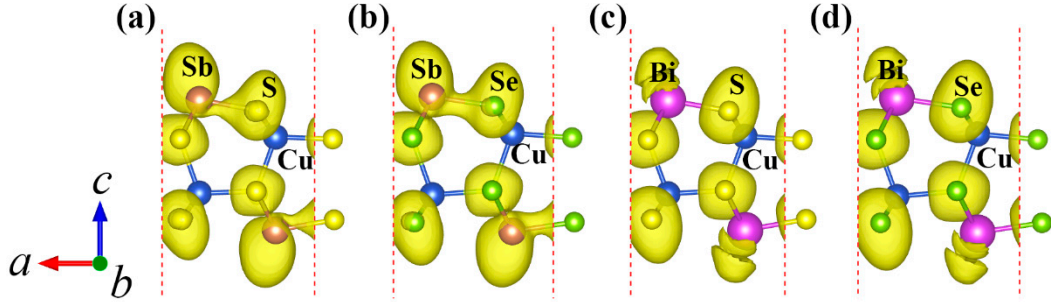

**Figure S1** The Electron Localization Functions (ELFs) for monolayer (a) CuSbS<sub>2</sub>, (b) CuSbSe<sub>2</sub>, (c) CuBiS<sub>2</sub>, and (d) CuBiSe<sub>2</sub>.

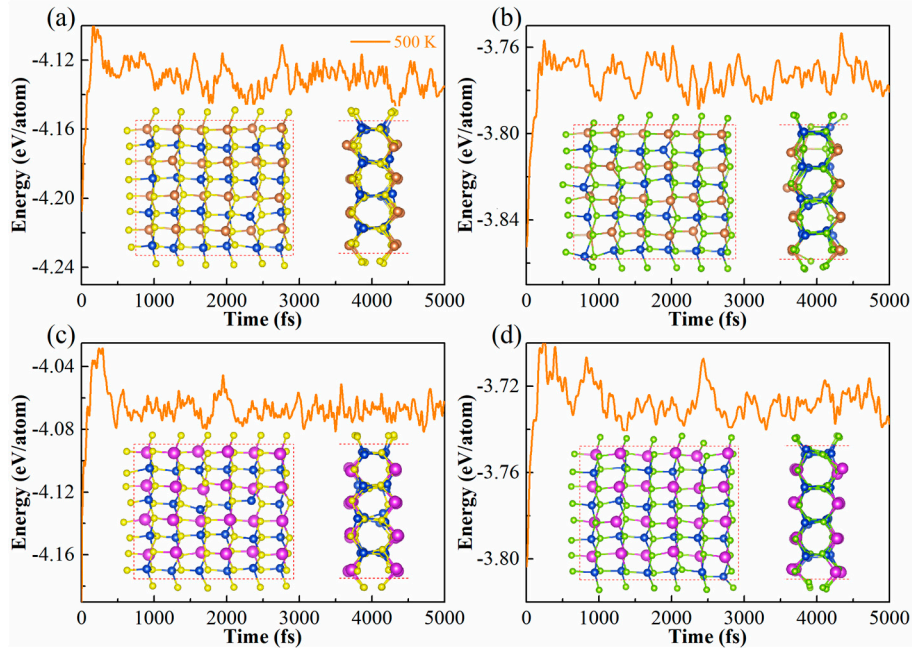

**Figure S2** The energy variations as well as the top/side view of the snapshots from the *ab initio* molecules dynamics simulation for the monolayer (a) CuSbS<sub>2</sub>, (b) CuSbSe<sub>2</sub>, (c) CuBiS<sub>2</sub>, and (d) CuBiSe<sub>2</sub> at 500 K.

**Table S2** Bader charge analysis results for the monolayers.

| Monolayers          | Cu (e) | Sb/Bi (e) | S/Se (e) |
|---------------------|--------|-----------|----------|
| CuSbS <sub>2</sub>  | 0.49   | 0.99      | 0.74     |
| CuSbSe <sub>2</sub> | 0.37   | 0.76      | 0.57     |
| CuBiS <sub>2</sub>  | 0.48   | 0.98      | 0.73     |
| CuBiSe <sub>2</sub> | 0.36   | 0.79      | 0.56     |

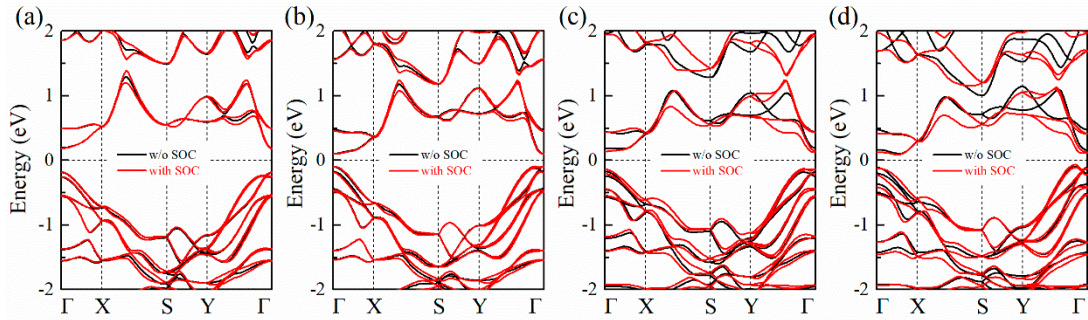

**Figure S3** The band structures at PBE functional without (black line) and with SOC (red line) for monolayer (a) CuSbS<sub>2</sub>, (b) CuSbSe<sub>2</sub>, (c) CuBiS<sub>2</sub>, and (d) CuBiSe<sub>2</sub>.

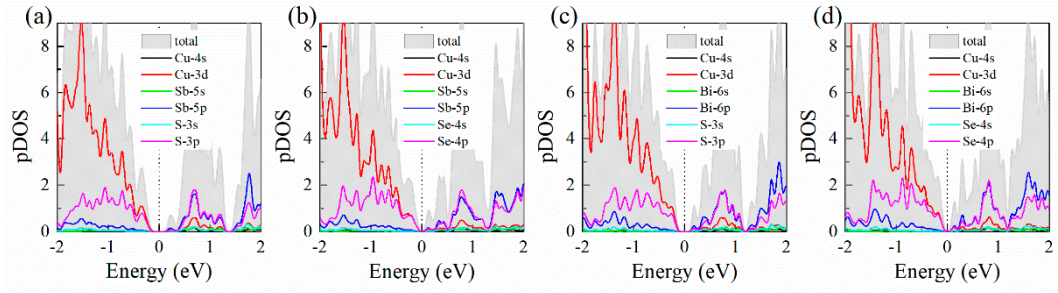

**Figure S4** The partial density of states of monolayer (a) CuSbS<sub>2</sub>, (b) CuSbSe<sub>2</sub>, (c) CuBiS<sub>2</sub>, and (d) CuBiSe<sub>2</sub>.

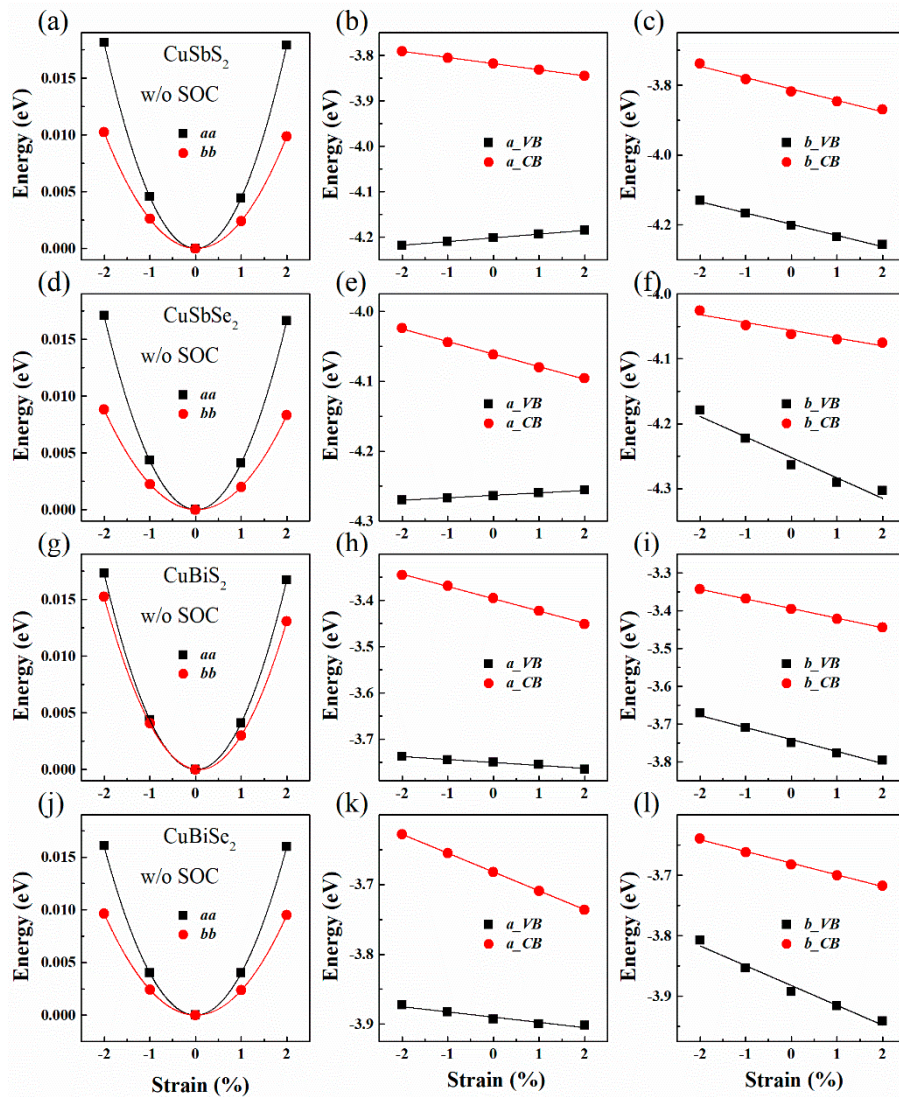

**Figure S5** (a, d, g, j) Total energy difference between the unstrained and strained CuMN<sub>2</sub> (M = Sb, Bi; N = S, Se) monolayer along the *a* and *b* directions; (b, e, h, k) Energy shift of VBM and CBM for the monolayers with respect to the lattice dilation and compression along *a* direction; (c, f, i, l) Energy shift of VBM and CBM for the monolayers with respect to the lattice dilation and compression along the *b* direction. These results are calculated by GGA+PBE functional without SOC.

**Table S3** The effective mass ( $m^*/m_0$ ), elastic modulus ( $C^{2D}/\text{N}\cdot\text{m}^{-1}$ ), deformation potential constant ( $E_l/\text{eV}$ ), electron ( $\mu_e/\text{cm}^2\cdot\text{V}^{-1}\cdot\text{s}^{-1}$ ) and hole mobility ( $\mu_h/\text{cm}^2\cdot\text{V}^{-1}\cdot\text{s}^{-1}$ ), and relaxation time ( $\tau/\text{fs}$ ) of monolayers at PBE functional without SOC.

| Monolayers          | Direction      | Type     | $m^*$ | $C^{2D}$ | $E_l$ | DPT      | APM     |        |
|---------------------|----------------|----------|-------|----------|-------|----------|---------|--------|
|                     |                |          |       |          |       | $\mu$    | $\mu$   | $\tau$ |
| CuSbS <sub>2</sub>  | <i>a</i> -axis | electron | 2.12  | 61.64    | 1.35  | 477.09   | 169.72  | 204.64 |
|                     |                | hole     | 0.83  |          | 0.82  | 3175.85  | 566.57  | 268.12 |
|                     | <i>b</i> -axis | electron | 0.24  | 34.38    | 3.26  | 403.56   | 850.67  | 115.99 |
|                     |                | hole     | 0.66  |          | 3.22  | 145.41   | 349.35  | 130.61 |
| CuSbSe <sub>2</sub> | <i>a</i> -axis | electron | 1.68  | 51.83    | 1.80  | 310.01   | 407.39  | 389.20 |
|                     |                | hole     | 0.69  |          | 0.35  | 19458.67 | 1452.69 | 567.04 |
|                     | <i>b</i> -axis | electron | 0.26  | 26.31    | 1.20  | 2329.38  | 2688.94 | 390.42 |
|                     |                | hole     | 0.66  |          | 3.16  | 125.11   | 497.50  | 188.05 |
| CuBiS <sub>2</sub>  | <i>a</i> -axis | electron | 2.01  | 55.59    | 2.66  | 101.42   | 90.99   | 103.93 |
|                     |                | hole     | 0.93  |          | 0.64  | 5209.96  | 638.95  | 338.54 |
|                     | <i>b</i> -axis | electron | 0.34  | 46.17    | 2.55  | 546.82   | 478.59  | 91.63  |
|                     |                | hole     | 0.38  |          | 3.17  | 430.71   | 736.19  | 159.72 |
| CuBiSe <sub>2</sub> | <i>a</i> -axis | electron | 0.76  | 47.03    | 2.70  | 335.64   | 449.27  | 194.25 |
|                     |                | hole     | 0.77  |          | 0.75  | 4119.16  | 764.24  | 336.58 |
|                     | <i>b</i> -axis | electron | 0.38  | 28.09    | 1.94  | 772.63   | 911.09  | 198.00 |
|                     |                | hole     | 0.40  |          | 3.28  | 247.06   | 713.95  | 163.73 |



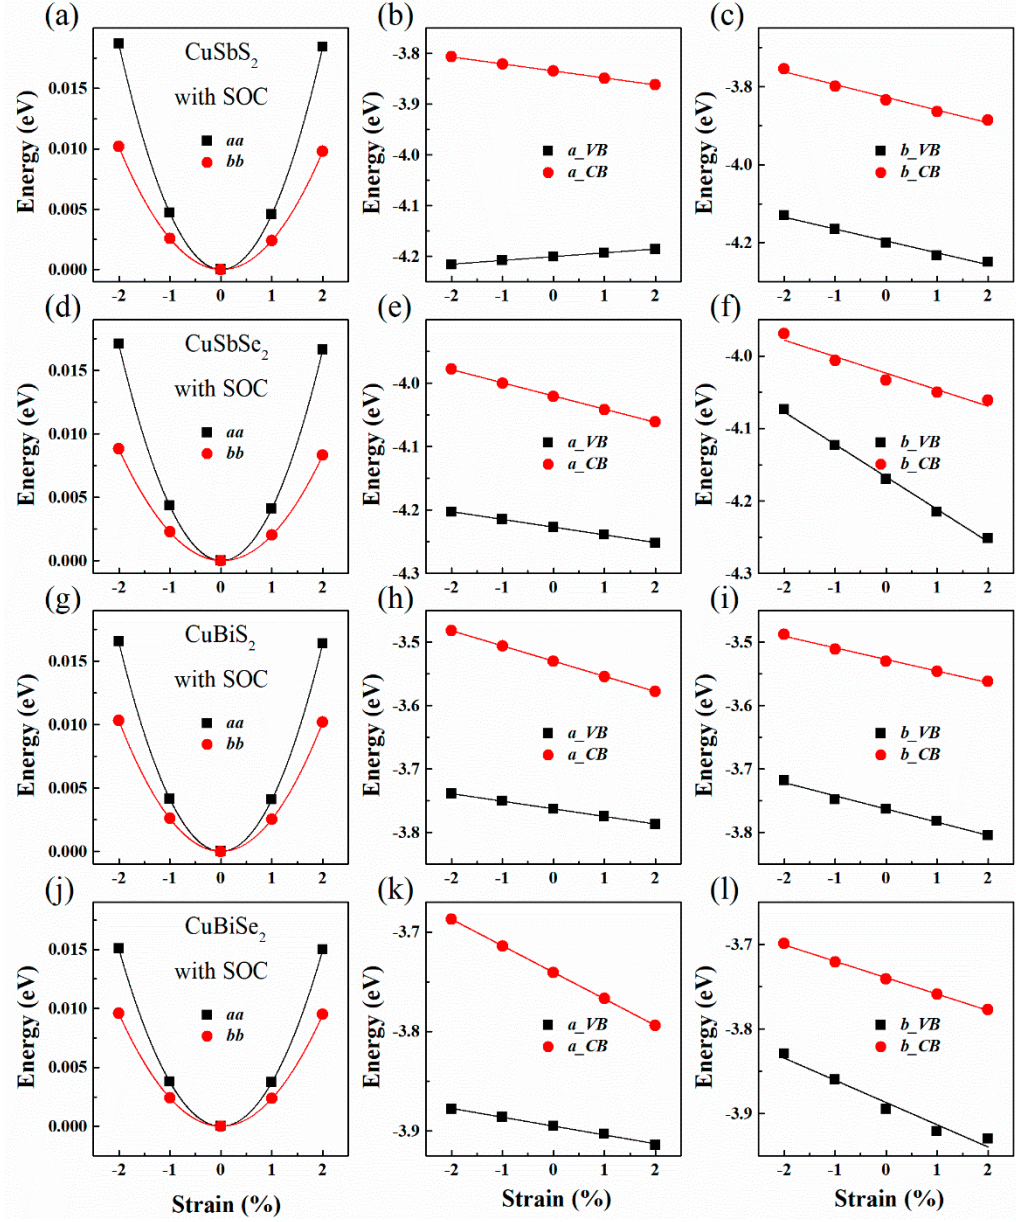

**Figure S6** (a, d, g, j) Total energy difference between the unstrained and strained CuMN<sub>2</sub> (M = Sb, Bi; N = S, Se) monolayer along the *a* and *b* directions; (b, e, h, k) Energy shift of VBM and CBM for the monolayers with respect to the lattice dilation and compression along *a* direction; (c, f, i, l) Energy shift of VBM and CBM for the monolayers with respect to the lattice dilation and compression along the *b* direction. These results are calculated by GGA+PBE functional with SOC.

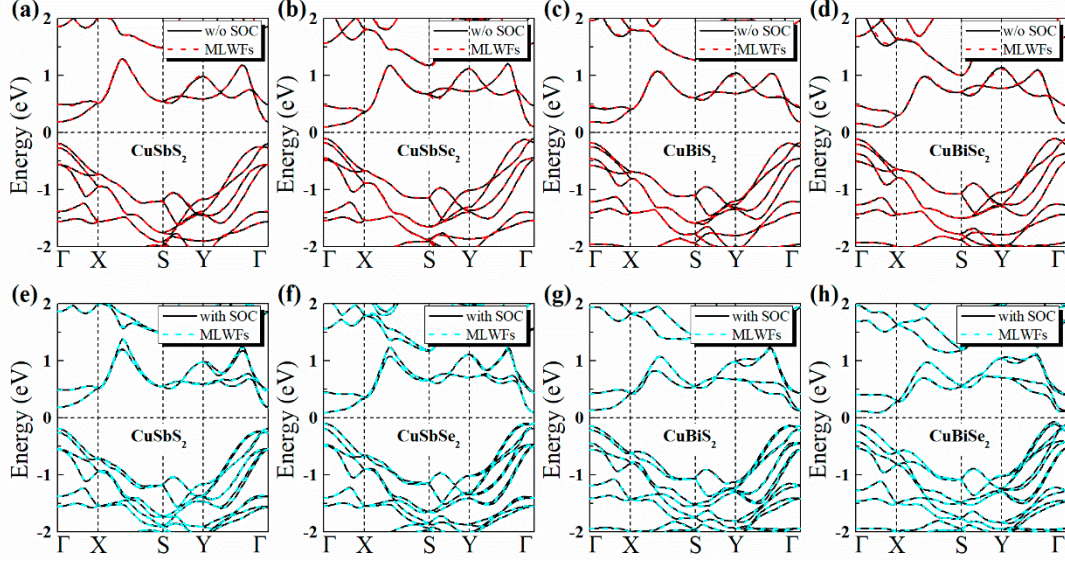

**Figure S7** The band structures at GGA+PBE functional and MLWFs calculated by Wannier90 code. The close coincidence of two curves suggests that the Boltzmann electron transport equation solved by wannier90 code is accurate and reliable.

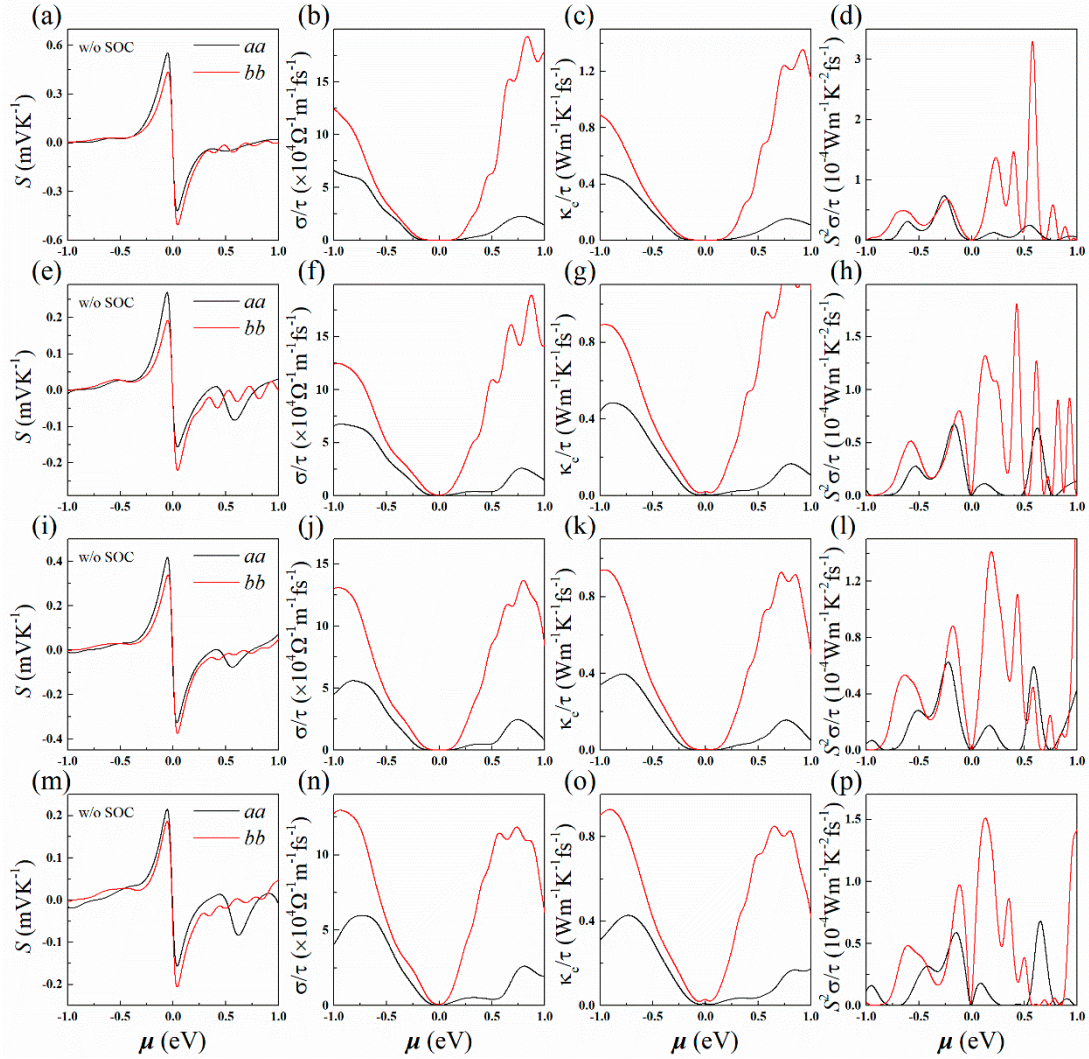



**Figure S8** Electron transport properties of 2D CuMN<sub>2</sub> (M = Sb, Bi; N = S, Se). (a, e, i, m) seebeck coefficients, (b, f, j, n) electrical conductivities, (c, g, k, o) electron thermal conductivities and (d, h, i, p) Power factors along *a*- (black line) and *b*- directions (red line) without SOC functional.

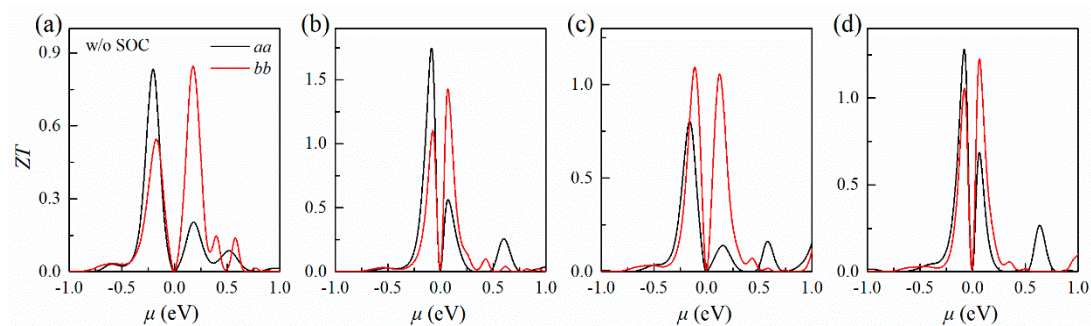

**Figure S9** *ZT* values of the monolayer (a) CuSbS<sub>2</sub>, (b) CuSbSe<sub>2</sub>, (c) CuBiS<sub>2</sub>, and (d) CuBiSe<sub>2</sub> without SOC functional.
